# Supplementary material
Source: HighWire-hosted journal article supplement (https://erj.ersjournals.com/content/53/3/1801183)
Supplement: inline-supplementary-material-2 [file inline-supplementary-material-2.pdf]

**Supplementary Table S1.** Baseline demographic and clinical characteristics of 80 patients with COPD included in the discovery cohort (BASCO study)

| Characteristics                                           | n=80             |
|-----------------------------------------------------------|------------------|
| Age, years (mean $\pm$ SD)                                | 68.9 $\pm$ 8.9   |
| Male, n (%)                                               | 49 (61.2)        |
| Current smokers, n (%)                                    | 30 (37.5)        |
| Pack-years (mean $\pm$ SD)                                | 57.2 $\pm$ 28.5  |
| GOLD stage, n (%)                                         |                  |
| II                                                        | 42 (52.5)        |
| III                                                       | 24 (30.0)        |
| IV                                                        | 14 (17.5)        |
| Lung function parameters                                  |                  |
| FVC, post-brd, % predicted (mean $\pm$ SD)                | 85.8 $\pm$ 16.3  |
| FEV <sub>1</sub> , post-brd, % predicted (mean $\pm$ SD)  | 50.1 $\pm$ 19.4  |
| FEV <sub>1</sub> /FVC post-brd % (mean $\pm$ SD)          | 40.9 $\pm$ 12.4  |
| Residual volume (RV), % (mean $\pm$ SD)                   | 166.4 $\pm$ 50.4 |
| Total lung capacity (TLC), % (mean $\pm$ SD)              | 117.1 $\pm$ 20.8 |
| RV/TLC % (mean $\pm$ SD)                                  | 55.3 $\pm$ 10.1  |
| Diffusion capacity (D <sub>LCO</sub> ), % (mean $\pm$ SD) | 52.3 $\pm$ 20.1  |

Abbreviations: SD: standard deviation; GOLD: Global Initiative for Chronic Obstructive Lung Disease; FEV<sub>1</sub>: forced expiratory volume in 1 sec; FVC: forced vital capacity; post-brd: post-bronchodilation; FVC= forced vital capacity; ABGA= arterial blood gas analysis . <sup>a</sup> GOLD stages are based on FEV<sub>1</sub> % predicted: II:  $\geq$  50% <80%; III:  $\geq$  30% <50%; IV:  $\leq$  30%.
