# Supplementary material
Source: HighWire-hosted journal article supplement (https://erj.ersjournals.com/content/53/3/1801183)
Supplement: inline-supplementary-material-3 [file inline-supplementary-material-3.pdf]

**Supplementary Table S2.** Comorbidities of the 506 patients included in the validation cohort

| Comorbidities             | N=506, number (%) |
|---------------------------|-------------------|
| Arterial Hypertension     | 256 (50.6)        |
| Coronary arterial disease | 114 (22.5)        |
| Congestive heart failure  | 76 (15.0)         |
| Diabetes mellitus         | 62 (12.3)         |
| Dementia                  | 8 (1.6)           |
| Depression                | 71 (14.0)         |
| Malignancy                | 31 (6.1)          |
| Myocardial infarction     | 49 (9.7)          |
| Pulmonary hypertension    | 50 (9.9)          |
| Renal failure             | 43 (8.5)          |
