# Supplementary material
Source: HighWire-hosted journal article supplement (https://erj.ersjournals.com/content/53/3/1801183)
Supplement: inline-supplementary-material-4 [file inline-supplementary-material-4.pdf]

**Supplementary Table S3.** Clinical outcomes within the 2 years follow up period for the COPD patients in the validation cohort

| Clinical outcome                  | Median (interquartile range) |
|-----------------------------------|------------------------------|
| Exacerbations per year            | 0.72 (0-1.8)                 |
| Severe exacerbations per year     | 0 (0-0)                      |
| Time to exacerbation, days        | 338 (135-697)                |
| Time to severe exacerbation, days | 701 (342-748)                |
| Time to death, days               | 722 (395-762)                |
