# Supplementary material
Source: HighWire-hosted journal article supplement (https://erj.ersjournals.com/content/53/3/1801183)
Supplement: inline-supplementary-material-5 [file inline-supplementary-material-5.pdf]

**Supplementary Table S4. Association of various predictors at baseline with HA changes between stable state and moderate or severe exacerbations**

| Parameter                     | Estimate | Std. Error | z value | Pr(> z ) |
|-------------------------------|----------|------------|---------|----------|
| <b>Moderate exacerbations</b> |          |            |         |          |
| Age                           | 0.2999   | 0.3340     | 0.8979  | 0.3993   |
| FEV <sub>1</sub> % predicted  | 0.3220   | 0.1303     | 2.4707  | 0.0186   |
| Charlson score                | 0.2889   | 3.1617     | 0.0914  | 0.9892   |
| Adjusted Charlson score       | 1.1065   | 2.2549     | 0.4907  | 0.7173   |
| <b>Severe exacerbations</b>   |          |            |         |          |
| Age                           | 0.6153   | 0.5567     | 1.1053  | 0.2912   |
| FEV <sub>1</sub> % predicted  | 0.0532   | 0.4391     | 0.1212  | 0.9729   |
| Charlson score                | 10.1173  | 4.4064     | 2.2960  | 0.0328   |
| Adjusted Charlson score       | 7.7463   | 3.3490     | 2.3130  | 0.0275   |

Putative baseline predictors (n=102) of a change in serum levels of HA between baseline and moderate or severe exacerbations were assessed using linear mixed-effects models. Among parameters tested were: symptoms (dyspnea, fatigue, cough, color of sputum); physical examination (blood pressure, heart rate, respiratory rate, peripheral oxygen saturation, 6-minute walking distance); comorbidities (adjusted and unadjusted Charlson score, medication for comorbidities); lung function (FEV<sub>1</sub> % predicted, FEV<sub>1</sub>/FVC).
