# Supplementary material
Source: HighWire-hosted journal article supplement (https://erj.ersjournals.com/content/53/3/1801183)
Supplement: inline-supplementary-material-6 [file inline-supplementary-material-6.pdf]

**Supplementary Table S5.** Correlation analysis (Spearman's rho) of hyaluronic acid in serum of COPD patients at moderate and severe exacerbations with biomarkers of inflammation

| Hyaluronic acid        | Leucocytes |         | CRP    |         |
|------------------------|------------|---------|--------|---------|
|                        | rho        | p value | rho    | p value |
| Moderate exacerbations | -0.246     | 0.052   | -0.143 | 0.292   |
| Severe exacerbations   | 0.063      | 0.564   | -0.037 | 0.747   |
| All exacerbations      | 0.090      | 0.273   | 0.052  | 0.553   |
