# Supplementary material
Source: HighWire-hosted journal article supplement (https://erj.ersjournals.com/content/53/3/1801183)
Supplement: inline-supplementary-material-7 [file inline-supplementary-material-7.pdf]

**Supplementary Table S6.** Correlation analysis (Spearman's rho) of hyaluronidase activity in serum of COPD patients (n=506)

| Parameter                    | Rho    | p value |
|------------------------------|--------|---------|
| Age                          | -0.005 | 0.914   |
| Body mass index              | 0.011  | 0.824   |
| Packs per year               | 0.052  | 0.305   |
| FEV <sub>1</sub> % predicted | -0.109 | 0.034   |
| FEV <sub>1</sub> /FVC        | -0.067 | 0.194   |
| Adjusted Charlson score      | -0.031 | 0.528   |
| Borg Dyspnea Scale           | 0.016  | 0.765   |
| 6-minute walking distance    | -0.005 | 0.922   |
| Survival time                | -0.118 | 0.017   |

**Abbreviations:** FEV<sub>1</sub>: forced expiratory volume in 1 sec; post-brd: post-bronchodilatation
